# Supplementary material for: A Combination of Hand-held Models and Computer Imaging Programs Helps Students Answer Oral Questions about Molecular Structure and Function: A Controlled Investigation of Student Learning
Source: Atypon-hosted journal article supplement (doi:10.1187/cbe.08-07-0039), 2009-03-01
Supplement: supp3.pdf [file supp3.pdf]

**Appendix 3:** Rubric used to evaluate mutation question on baseline and end of semester surveys

| Survey Question                                                                                                                                                                                                                                                                                                                                               | * 0 = simply did not know                    | 1 = demonstrated some understanding but missing many key concepts                                                                                        | 2 = demonstrated good understanding but still missing a few key concepts                                                                         | 3 = demonstrated sophisticated understanding of almost all concepts                                                                                                                                         |
|---------------------------------------------------------------------------------------------------------------------------------------------------------------------------------------------------------------------------------------------------------------------------------------------------------------------------------------------------------------|----------------------------------------------|----------------------------------------------------------------------------------------------------------------------------------------------------------|--------------------------------------------------------------------------------------------------------------------------------------------------|-------------------------------------------------------------------------------------------------------------------------------------------------------------------------------------------------------------|
| <p>Please answer the following question as best as you can, using concise and clear language.</p> <p><i>It is possible for a mutation in a single amino acid sidechain (also known as a residue or R-group) to make a protein non-functional. <b>How</b> this might be possible? (You can use the back of this form to finish your answer if needed.)</i></p> | <p>No idea or answer was entirely wrong.</p> | <p>Recognize that proteins are made of different amino acids but don't indicate that amino acids determine protein structure and therefore function.</p> | <p>Realize that the sidechain type is important for the protein's function, but don't make direct connection between structure and function.</p> | <p>A protein's function (e.g., binding a substrate or metal ion) depends upon its structure. A protein's structure in turn is determined by the way its individual sidechains interact with each other.</p> |
