# Supplementary material for: A Combination of Hand-held Models and Computer Imaging Programs Helps Students Answer Oral Questions about Molecular Structure and Function: A Controlled Investigation of Student Learning
Source: Atypon-hosted journal article supplement (doi:10.1187/cbe.08-07-0039), 2009-03-01
Supplement: supp4.pdf [file supp4.pdf]

**Appendix 4:** Rubric used to assess enzyme research project oral presentations during week 5 (rating was given to team as a whole).

|              |                                                                                                                                                                                     |                                                                                                                                                                                                                            |                                                                                                                                                                                                   |                                                                                                                                                                                                                                                                                                                                            |
|--------------|-------------------------------------------------------------------------------------------------------------------------------------------------------------------------------------|----------------------------------------------------------------------------------------------------------------------------------------------------------------------------------------------------------------------------|---------------------------------------------------------------------------------------------------------------------------------------------------------------------------------------------------|--------------------------------------------------------------------------------------------------------------------------------------------------------------------------------------------------------------------------------------------------------------------------------------------------------------------------------------------|
| Team members | <p>Were Bioinformatics tools mentioned in any way during the presentation (sequence alignments, BLAST search results, etc.)?</p> <p>If yes, please describe what was mentioned.</p> | <p>Were molecular imaging tools used in any way during the presentation (Protein Explorer images, physical models, molecular figures from papers/texts, etc.)?</p> <p>If yes, please describe what was used &amp; how.</p> | <p>Did the team use molecular structure to explain how their independent variable affects AP ability to bind substrate &amp; convert it to product (<i>i.e.</i>, their biological rationale)?</p> | <p>Rate the sophistication of the biological rationale with this scale:</p> <p>1 (rationale is almost or entirely absent)<br/>                 2 (some rationale presented, but needs a lot of work)<br/>                 3 (good rationale, needs a little work)<br/>                 4 (excellent rationale)</p> <p>Briefly explain:</p> |
|              | <b>Y/N</b>                                                                                                                                                                          | <b>Y/N</b>                                                                                                                                                                                                                 | <b>Y/N</b>                                                                                                                                                                                        | 1    2    3    4                                                                                                                                                                                                                                                                                                                           |
