# Supplementary material for: A Combination of Hand-held Models and Computer Imaging Programs Helps Students Answer Oral Questions about Molecular Structure and Function: A Controlled Investigation of Student Learning
Source: Atypon-hosted journal article supplement (doi:10.1187/cbe.08-07-0039), 2009-03-01
Supplement: supp5.pdf [file supp5.pdf]

**Appendix 5:** Rubric used by graduate TAs to evaluate quality of biological rationale, relevant PE imagery usage, and logical conclusions of discussion section in the final enzyme catalysis research papers.

|                            |                                                                                                                                                                                                                                                                                                                                                                                                                                                                                          |                                                                                                                                                                                                                                                                                    |                                                                                                                                                                                                                                                                                                                                                                                                                                                                                                                            |
|----------------------------|------------------------------------------------------------------------------------------------------------------------------------------------------------------------------------------------------------------------------------------------------------------------------------------------------------------------------------------------------------------------------------------------------------------------------------------------------------------------------------------|------------------------------------------------------------------------------------------------------------------------------------------------------------------------------------------------------------------------------------------------------------------------------------|----------------------------------------------------------------------------------------------------------------------------------------------------------------------------------------------------------------------------------------------------------------------------------------------------------------------------------------------------------------------------------------------------------------------------------------------------------------------------------------------------------------------------|
| <p><b>Student name</b></p> | <p>Biological Rationale: Did student discuss <i>how</i> their treatment might affect AP structure such that its ability to bind substrate/ its reaction velocity were changed?</p> <p>If yes, how well was this done?<br/> <b>1</b> (poorly; barely mentioned it)<br/> <b>2</b> (o.k.; explained it somewhat but missing several key details)<br/> <b>3</b> (well; explanation is only missing a few details)<br/> <b>4</b> (excellently; clear, logical &amp; complete explanation)</p> | <p>Did student present any Protein Explorer-type images in their paper? <b>(y/n)</b></p> <p>If yes, were images used to support biological rationale/conclusions? (<i>i.e.</i>, demonstrated where/how AP structure is affected by their experimental treatment)? <b>(y/n)</b></p> | <p>In “Discussion”: Were the conclusions about AP activity based on links between results and the biological rationale from the Intro? <b>(y/n)</b></p> <p>If yes, how well was this done?<br/> <b>1</b> (poorly; conclusions barely made a link between results &amp; biological rationale)<br/> <b>2</b> (o.k.; link was made but missing several key details)<br/> <b>3</b> (well; link was made &amp; is only missing a few minor details)<br/> <b>4</b> (excellently; link was thorough, appropriate and logical)</p> |
|                            | <p>(y/n)</p> <p>1    2    3    4</p>                                                                                                                                                                                                                                                                                                                                                                                                                                                     | <p>(y/n)</p> <p>(y/n)</p>                                                                                                                                                                                                                                                          | <p>(y/n)</p> <p>1    2    3    4</p>                                                                                                                                                                                                                                                                                                                                                                                                                                                                                       |
