# Supplementary material for: A Combination of Hand-held Models and Computer Imaging Programs Helps Students Answer Oral Questions about Molecular Structure and Function: A Controlled Investigation of Student Learning
Source: Atypon-hosted journal article supplement (doi:10.1187/cbe.08-07-0039), 2009-03-01
Supplement: supp7.pdf [file supp7.pdf]

**Appendix 7a:** rubric used to evaluate post semester interview answers

| Interview Question | *Category of answer given | Answer Comments | Tool used? (0=neither, 1=PE, 2= model, 3=both) | Tool Comments |
|--------------------|---------------------------|-----------------|------------------------------------------------|---------------|
| Q5 (and so on)     |                           |                 |                                                |               |

**Appendix 7b:** Rubric of defined assessment category levels for each post semester interview question.

| Interview Question                                                                               | 0 = simply did not know                                    | 1 = demonstrated some understanding but missing many key concepts                                                                | 2 = demonstrated good understanding but still missing a few key concepts                                                                                   | 3 = demonstrated sophisticated understanding of almost all concepts                                                                                                 |
|--------------------------------------------------------------------------------------------------|------------------------------------------------------------|----------------------------------------------------------------------------------------------------------------------------------|------------------------------------------------------------------------------------------------------------------------------------------------------------|---------------------------------------------------------------------------------------------------------------------------------------------------------------------|
| 5. Can you tell me what you've learned about protein 1°, 2°, 3°, and 4° structure?               | Did not correctly define any of the 4 structures           | Correctly defined only one of these structures OR answers for 3-4 structures were only partially correct                         | Correctly defined 2-3 structures OR answers for all 4 structures were correct for the most part                                                            | Correctly defined all 4 structures                                                                                                                                  |
| 6. What kind of biomolecule do you think this is: lipid, protein, nucleic acid, or carbohydrate? | simply did not know (no guess)                             | wrong answer given                                                                                                               | correct answer, but was unsure                                                                                                                             | confident, correct answer                                                                                                                                           |
| 7. What makes you say this?                                                                      | Had no justification for their answer to Q6; just guessing | Correctly pointed out 1 feature found only in proteins but also mentioned one or more incorrect features                         | Correctly pointed out 1 feature found only in proteins                                                                                                     | Correctly pointed out 2 or more features that are only found in proteins; <i>e.g.</i> , beta sheets, alpha helices, amino acid residues, amino and carboxyl termini |
| 8. Can you find the N-terminus?                                                                  | simply did not know (no guess)                             | wrong answer given                                                                                                               | right answer, but was unsure/correct guess; OR only knew it because they saw the color code on the CPK chart                                               | confident, correct answer                                                                                                                                           |
| 9. Can you point out any alpha helices and/or Beta sheets?                                       | Could not identify either structure                        | knew that alpha helices and beta sheets were examples of secondary structure, but did not identify them correctly on model or PE | identified either alpha helix OR beta sheet correctly on model and/or PE                                                                                   | correctly identified both alpha helices AND beta sheets on model and/or PE                                                                                          |
| 10. Does this biomolecule show any quaternary structure?                                         | simply did not know (no guess)                             | wrong answer given                                                                                                               | correct answer, but was unsure                                                                                                                             | confident, correct answer                                                                                                                                           |
| 11. Is this a single protein chain or a dimer?                                                   | simply did not know (no guess)                             | Incorrectly answered "yes" to Q10 and incorrectly indicated that this was a dimer                                                | Incorrectly answered "yes" to Q10 but correctly indicated that this was a single chain                                                                     | Correctly answered "no" to Q10 and correctly indicated that this was a single chain                                                                                 |
| 13. Can you name any of the amino acid sidechain residues that are displayed?                    | simply did not know (no guess)                             | Attempted to but incorrectly identified residues                                                                                 | Correctly identified at least one residue but incorrectly identified at least one other OR Correctly identified one or more residues <b>with prompting</b> | Correctly identified one or more residues without prompting                                                                                                         |
| 14. Can you take a guess as to what this molecule is and/or what its function might be?          | No attempt to identify                                     | A guess (correct or incorrect) without any reason given                                                                          | A guess (correct or incorrect) with some flawed or incomplete logic; made assumptions that weren't obvious                                                 | Correct guess supported by logical evidence                                                                                                                         |
| 15. Can you identify the changes or differences between the 1st and 2nd version of the molecule? | did not see any differences between the two molecules      | noted that there was a conformational change but gave no details, OR identified only one of the 4 changes                        | recognized 2 to 3 of the changes mentioned in a "3" answer in next cell                                                                                    | clearly identified conformational changes in green loop, saw addition of bound substrate, saw addition of ATP, recognized that tyrosines were phosphorylated        |
| 16a. Now that you know these details, can you propose a function for the yellow region?          | did not attempt to answer                                  | wrong answer given                                                                                                               | Partially correct answer, <i>e.g.</i> , see that it binds something but don't recognize that it's ATP                                                      | Correctly identified yellow as being ATP/nucleotide binding location                                                                                                |
| 16b. For the orange region?                                                                      | did not attempt to answer                                  | wrong answer given ( <i>e.g.</i> , binds ATP)                                                                                    | Partially correct answer, <i>e.g.</i> , see that tyrosine residues are                                                                                     | Correctly identified orange as catalytic loop (where phosphorous is transferred from                                                                                |

|                                                                                                                                                                                                        |                                                                       |                                                                                                                                                        |                                                                                                                                                                |                                                                                                                                                                                                                                                                                                                       |
|--------------------------------------------------------------------------------------------------------------------------------------------------------------------------------------------------------|-----------------------------------------------------------------------|--------------------------------------------------------------------------------------------------------------------------------------------------------|----------------------------------------------------------------------------------------------------------------------------------------------------------------|-----------------------------------------------------------------------------------------------------------------------------------------------------------------------------------------------------------------------------------------------------------------------------------------------------------------------|
|                                                                                                                                                                                                        |                                                                       |                                                                                                                                                        | involved but don't recognize that they are now phosphorylated; OR mentioned that it may be a stabilizing region                                                | ATP to tyrosines)                                                                                                                                                                                                                                                                                                     |
| 17. Can you take a guess as to what this molecule is and what it does?                                                                                                                                 | No attempt to identify                                                | A guess (correct or incorrect) without any reason given                                                                                                | A guess (correct or incorrect) with some flawed or incomplete logic; made assumptions that weren't obvious                                                     | Correct guess supported by logical evidence                                                                                                                                                                                                                                                                           |
| 18. Dr. ... spent some time in lecture telling you about receptor tyrosine kinases. Can you tell me what you know about them?                                                                          | did not attempt to answer; OR supplied random keywords out of context | Correctly described one or two of the steps in a "3" answer, but left out key steps and/or incorrectly described them                                  | Correctly described most but not all of the steps in a "3" answer                                                                                              | 1. ligand binds receptor, 2. receptor dimerizes, 3. autophosphorylation of cytosolic domain (may mention conformational change here), 4. initiate signal transduction cascade (SH2 domain of GRB2 is phosphorylated to activate Sos OR substrate binds & is phosphorylated to initiate signal transduction cascade)** |
| 19. Now that you know that this model and the PE image represent the cytosolic portion only of one receptor tyrosine kinase, <b>can you describe what happens to this receptor</b> when insulin binds? | did not attempt to answer                                             | Mention dimerization and/or autophosphorylation, but they clearly did not recognize how autophosphorylation is depicted by the models and/or PE images | Mention dimerization followed by autophosphorylation, but it is unclear that they recognize how autophosphorylation is depicted by the models and/or PE images | Clearly demonstrated that they can apply their knowledge from lecture to the structures & events depicted by the physical models and/or PE images by stating that bound ligand causes receptor to <b>dimerize</b> (conformational change) followed by <b>autophosphorylation</b> of cytosolic domains                 |
| 20. Can you think of at least 2 mutations that would keep this receptor from transferring a signal after insulin is bound?                                                                             | did not attempt to answer                                             | gave one logical and correct mutation                                                                                                                  | gave two logical, correct but general mutations or gave one general and one specific                                                                           | gave two logical, correct and specific mutations                                                                                                                                                                                                                                                                      |
| 21. What mutations in this receptor tyrosine kinase might cause it to be constitutively activated (or always on)?                                                                                      | did not attempt to answer                                             | made attempt but their answer was inappropriate (e.g., "dominant - negative" mentioned but out of context)                                             | logical, correct but still general mutation                                                                                                                    | gave logical, correct and specific mutation                                                                                                                                                                                                                                                                           |

\*\*GRB2-SOS, Ras, MAP kinase pathway, AP1, txn factor may be mentioned; this is correct sequence. A second correct pathway is phosphorylation of PLC gamma SH2 domain which then initiates PIP2/calcium pathway

### Summary Questions about Interview

| Interview Question                                                                                                                                                                                                                                                                                                                                              | Comments                                                                                                                                                                                                                                                                                                                                                                                                                                                                                                   |
|-----------------------------------------------------------------------------------------------------------------------------------------------------------------------------------------------------------------------------------------------------------------------------------------------------------------------------------------------------------------|------------------------------------------------------------------------------------------------------------------------------------------------------------------------------------------------------------------------------------------------------------------------------------------------------------------------------------------------------------------------------------------------------------------------------------------------------------------------------------------------------------|
| 4. Michelle's been encouraging you to use Protein Explorer this semester.....how has that gone?                                                                                                                                                                                                                                                                 |                                                                                                                                                                                                                                                                                                                                                                                                                                                                                                            |
| <b>Re Q18 to Q19 transition:</b> Overall, how well do you think this student transferred their knowledge from Biocore lecture to this new protein? (e.g., How well do you think the student understood that the phosphorylated tyrosine residues shown in the molecule <i>are</i> the result of the cytosolic autophosphorylation events they described in Q18? | Category of answer _____ (* <b>0</b> = simply did not know, <b>1</b> = demonstrated some understanding but missing many key concepts, <b>2</b> = demonstrated good understanding but still missing a few key concepts, <b>3</b> = demonstrated sophisticated understanding of almost all concepts)<br><i>Here we can also make note of whether student used PE and/or models to describe the following: 1. dimerization/conformational change, 2. autophosphorylation, 3. signal cascade is initiated.</i> |
| <b>Re Q22:</b> If student had any remaining questions or comments, were they informative?                                                                                                                                                                                                                                                                       |                                                                                                                                                                                                                                                                                                                                                                                                                                                                                                            |
