# Supplementary material for: A Combination of Hand-held Models and Computer Imaging Programs Helps Students Answer Oral Questions about Molecular Structure and Function: A Controlled Investigation of Student Learning
Source: Atypon-hosted journal article supplement (doi:10.1187/cbe.08-07-0039), 2009-03-01
Supplement: supp8.pdf [file supp8.pdf]

Appendix 8: Post-interview survey taken by 20 students immediately after their video-taped interview.

| Please rate how the following tools helped to facilitate your learning of molecular structure & function this semester | Were of No Help | Helped a Little | Helped Some | Helped a Good Deal | Helped a Great Deal |
|------------------------------------------------------------------------------------------------------------------------|-----------------|-----------------|-------------|--------------------|---------------------|
|                                                                                                                        | 1               | 2               | 3           | 4                  | 5                   |

|                                                                                          |                              |   |   |   |   |
|------------------------------------------------------------------------------------------|------------------------------|---|---|---|---|
| a. textbook reading for lecture                                                          | 1                            | 2 | 3 | 4 | 5 |
| b. lecture problem sets                                                                  | 1                            | 2 | 3 | 4 | 5 |
| c. computer images of biomolecules shown by professors in Biocore 303 lecture            | 1                            | 2 | 3 | 4 | 5 |
| d. physical models of biomolecules held by professors in Biocore 303 lecture             | 1                            | 2 | 3 | 4 | 5 |
| e. answering pre-lab questions                                                           | 1                            | 2 | 3 | 4 | 5 |
| f. Protein Explorer activity used during the second week of the enzyme catalysis project | 1                            | 2 | 3 | 4 | 5 |
| g. Using the Protein Explorer computer program on your own for subsequent projects       | 1                            | 2 | 3 | 4 | 5 |
| h. physical models you picked up & held in lab                                           | 1 (never saw or touched any) | 2 | 3 | 4 | 5 |
| i. conversations with TAs and instructors                                                | 1                            | 2 | 3 | 4 | 5 |
| j. conversations w/ other students                                                       | 1                            | 2 | 3 | 4 | 5 |

1. Which materials were most helpful to you today as you answered the interviewer's questions? (Choose only one).

- The pdb files for these molecules, displayed in Protein Explorer
- The physical, hand-held models
- A combination of both Protein Explorer and the hand-held physical models

2. If Protein Explorer was useful to you today, can you describe what kinds of questions it helped you to answer?

3. If the hand-held models were useful to you today, can you describe what kinds of questions they helped you to answer?

4. Can you describe how often and in what way you used physical models like these this spring?

5. Can you describe how often and in what way you used the Protein Explorer program this spring?

6. Have you taken college level biochemistry? \_\_\_\_\_ If so, what courses and when? \_\_\_\_\_

7. If you had to design a Biocore 304 research project that involved this tyrosine kinase receptor and had obtained the relevant literature, what tools would be most helpful to you?

- The pdb files for these molecules, displayed in Protein Explorer
- The physical, hand-held models
- A combination of both Protein Explorer and the hand-held physical models
